# Supplementary material for: A mechanism for sequence specificity in plant‐mediated interactions between herbivores
Source: PubMed Central journal article supplement (PMC6079637; doi:10.1111/nph.14328), 2016-11-29

## New Phytologist Supporting Information

Article title: **A mechanism for sequence specificity in plant-mediated interactions between herbivores**

Authors: Wei Huang, Christelle A. M. Robert, Maxime R. Hervé, Lingfei Hu, Zoe Bont and Matthias Erb

Article acceptance date: 11 October 2016

The following Supporting Information is available for this article:

**Fig. S1** Infestation by *D. v. virgifera* does not change aboveground damage by *S. frugiperda* larvae. Relative and absolute leaf damage caused by *S. frugiperda* on plants with and without previous infestation by *D. v. virgifera* is shown. AG, aboveground *S. frugiperda* larvae infestation; BG>AG, belowground infestation followed by aboveground infestation. Values are means  $\pm$  1 SE ( $n = 18$ ).

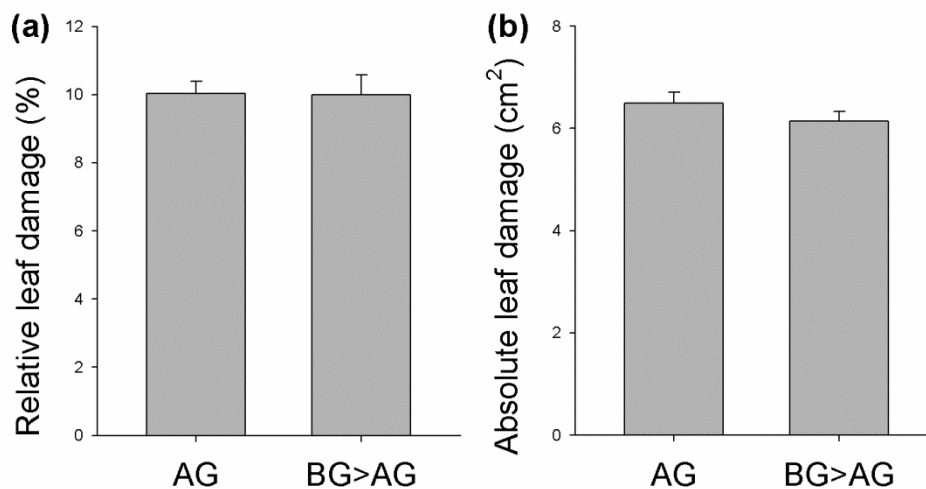

Supplement: NPH-214-169-s001.pdf [file NPH-214-169-s001.pdf]
